# Supplementary material for: Spaltiite, Tl 2 Cu 2 As 2 S 5 , one more new thallium sulfosalt mineral from Lengenbach quarry, Binn, Switzerland
Source: Copernicus journal article supplement (doi:10.5194/ejm-38-27-2026), 2026-01-09

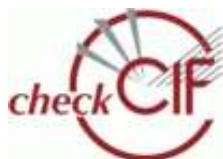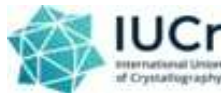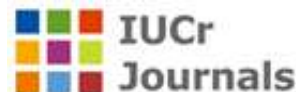

## checkCIF/PLATON report

You have not supplied any structure factors. As a result the full set of tests cannot be run.

THIS REPORT IS FOR GUIDANCE ONLY. IF USED AS PART OF A REVIEW PROCEDURE FOR PUBLICATION, IT SHOULD NOT REPLACE THE EXPERTISE OF AN EXPERIENCED CRYSTALLOGRAPHIC REFEREE.

No syntax errors found.      CIF dictionary      Interpreting this report

### Datablock: I

---

|                        |                                                                          |                                                                |                    |
|------------------------|--------------------------------------------------------------------------|----------------------------------------------------------------|--------------------|
| Bond precision:        | Tl- S = 0.0050 Å                                                         |                                                                | Wavelength=0.71073 |
| Cell:                  | a=15.791 (8)                                                             | b=10.000 (5)                                                   | c=6.323 (3)        |
|                        | alpha=90                                                                 | beta=99.25 (2)                                                 | gamma=90           |
| Temperature:           | 293 K                                                                    |                                                                |                    |
|                        | Calculated                                                               | Reported                                                       |                    |
| Volume                 | 985.5 (8)                                                                | 985.5 (8)                                                      |                    |
| Space group            | P 21/c                                                                   | P 21/c                                                         |                    |
| Hall group             | -P 2ybc                                                                  | -P 2ybc                                                        |                    |
| Moiety formula         | As <sub>4</sub> Cu <sub>4</sub> S <sub>10</sub> Tl <sub>2</sub> , 2 (Tl) | ?                                                              |                    |
| Sum formula            | As <sub>4</sub> Cu <sub>4</sub> S <sub>10</sub> Tl <sub>4</sub>          | As <sub>2</sub> Cu <sub>2</sub> S <sub>5</sub> Tl <sub>2</sub> |                    |
| Mr                     | 1692.00                                                                  | 845.96                                                         |                    |
| Dx, g cm <sup>-3</sup> | 5.702                                                                    | 5.702                                                          |                    |
| Z                      | 2                                                                        | 4                                                              |                    |
| Mu (mm <sup>-1</sup> ) | 44.509                                                                   | 44.510                                                         |                    |
| F000                   | 1464.0                                                                   | 1464.0                                                         |                    |
| F000'                  | 1449.92                                                                  |                                                                |                    |
| h, k, lmax             | 28, 18, 11                                                               | 28, 18, 11                                                     |                    |
| Nref                   | 6153                                                                     | 6057                                                           |                    |
| Tmin, Tmax             |                                                                          |                                                                |                    |
| Tmin'                  |                                                                          |                                                                |                    |

Correction method= Not given

Data completeness= 0.984

Theta(max)= 40.106

R(reflections)= 0.1218( 4753)

wR2(reflections)=  
0.3604( 6057)

S = 1.151

Npar= 101

---

The following ALERTS were generated. Each ALERT has the format

**test-name\_ALERT\_alert-type\_alert-level.**

Click on the hyperlinks for more details of the test.

---

### Alert level A

EXPT005\_ALERT\_1\_A \_exptl\_crystal\_description is missing

Crystal habit description.

The following tests will not be performed.

CRYSR\_01

DIFF003\_ALERT\_1\_A \_diffrn\_measurement\_device\_type is missing

Diffractometer make and type. Replaces \_diffrn\_measurement\_type.

PLAT183\_ALERT\_1\_A Missing \_cell\_measurement\_reflns\_used Value .... Please Do !

PLAT184\_ALERT\_1\_A Missing \_cell\_measurement\_theta\_min Value .... Please Do !

PLAT185\_ALERT\_1\_A Missing \_cell\_measurement\_theta\_max Value .... Please Do !

PLAT699\_ALERT\_1\_A Missing \_exptl\_crystal\_description Value ..... Please Do !

---

### Alert level B

PLAT084\_ALERT\_3\_B High wR2 Value (i.e. > 0.25) ..... 0.36 Report

PLAT097\_ALERT\_2\_B Large Reported Max. (Positive) Residual Density 12.15 eA-3

PLAT213\_ALERT\_2\_B Atom As1 has ADP max/min Ratio ..... 4.6 prolat

---

### Alert level C

DIFMN02\_ALERT\_2\_C The minimum difference density is < -0.1\*ZMAX\*0.75

\_refine\_diff\_density\_min given = -7.779

Test value = -6.075

DIFMN03\_ALERT\_1\_C The minimum difference density is < -0.1\*ZMAX\*0.75

The relevant atom site should be identified.

DIFMX02\_ALERT\_1\_C The maximum difference density is > 0.1\*ZMAX\*0.75

The relevant atom site should be identified.

RINTA01\_ALERT\_3\_C The value of Rint is greater than 0.12

Rint given 0.163

PLAT020\_ALERT\_3\_C The Value of Rint is Greater Than 0.12 ..... 0.163 Report

PLAT041\_ALERT\_1\_C Calc. and Reported SumFormula Strings Differ Please Check

Calc: As4 Cu4 S10 Tl4

Rep.: As2 Cu2 S5 Tl2

PLAT052\_ALERT\_1\_C Info on Absorption Correction Method Not Given Please Do !

PLAT053\_ALERT\_1\_C Minimum Crystal Dimension Missing (or Error) ... Please Check

PLAT054\_ALERT\_1\_C Medium Crystal Dimension Missing (or Error) ... Please Check

PLAT055\_ALERT\_1\_C Maximum Crystal Dimension Missing (or Error) ... Please Check

PLAT082\_ALERT\_2\_C High R1 Value ..... 0.12 Report

PLAT098\_ALERT\_2\_C Large Reported Min. (Negative) Residual Density -7.78 eA-3

PLAT250\_ALERT\_2\_C Large U3/U1 Ratio for <U(i,j)> Tensor(Resd 1) 2.6 Note

---

### Alert level G

|                   |                                                  |       |              |
|-------------------|--------------------------------------------------|-------|--------------|
| PLAT004_ALERT_5_G | Polymeric Structure Found with Maximum Dimension | 1     | Info         |
| PLAT045_ALERT_1_G | Calculated and Reported Z Differ by a Factor ... | 0.500 | Check        |
| PLAT083_ALERT_2_G | SHELXL Second Parameter in WGHT Unusually Large  | 95.00 | Why ?        |
| PLAT199_ALERT_1_G | Reported _cell_measurement_temperature ..... (K) | 293   | Check        |
| PLAT200_ALERT_1_G | Reported _diffn_ambient_temperature ..... (K)    | 293   | Check        |
| PLAT794_ALERT_5_G | Tentative Bond Valency for Tl1 (I) .             | 1.01  | Info         |
| PLAT794_ALERT_5_G | Tentative Bond Valency for Tl2 (I) .             | 1.00  | Info         |
| PLAT883_ALERT_1_G | Absent Datum for _atom_sites_solution_primary .. |       | Please Do !  |
| PLAT933_ALERT_2_G | Number of HKL-OMIT Records in Embedded .res File | 1     | Note         |
|                   | 1 0 0,                                           |       |              |
| PLAT941_ALERT_3_G | Average HKL Measurement Multiplicity .....       | 3.3   | Low          |
| PLAT965_ALERT_2_G | The SHELXL WEIGHT Optimisation has not Converged |       | Please Check |

---

6 **ALERT level A** = Most likely a serious problem - resolve or explain  
 3 **ALERT level B** = A potentially serious problem, consider carefully  
 13 **ALERT level C** = Check. Ensure it is not caused by an omission or oversight  
 11 **ALERT level G** = General information/check it is not something unexpected

17 ALERT type 1 CIF construction/syntax error, inconsistent or missing data  
 9 ALERT type 2 Indicator that the structure model may be wrong or deficient  
 4 ALERT type 3 Indicator that the structure quality may be low  
 0 ALERT type 4 Improvement, methodology, query or suggestion  
 3 ALERT type 5 Informative message, check

---

It is advisable to attempt to resolve as many as possible of the alerts in all categories. Often the minor alerts point to easily fixed oversights, errors and omissions in your CIF or refinement strategy, so attention to these fine details can be worthwhile. It is up to the individual to critically assess their own results and, if necessary, seek expert advice.

---

**PLATON version of 26/09/2025; check.def file version of 20/09/2025**

Datablock 1 - ellipsoid plot

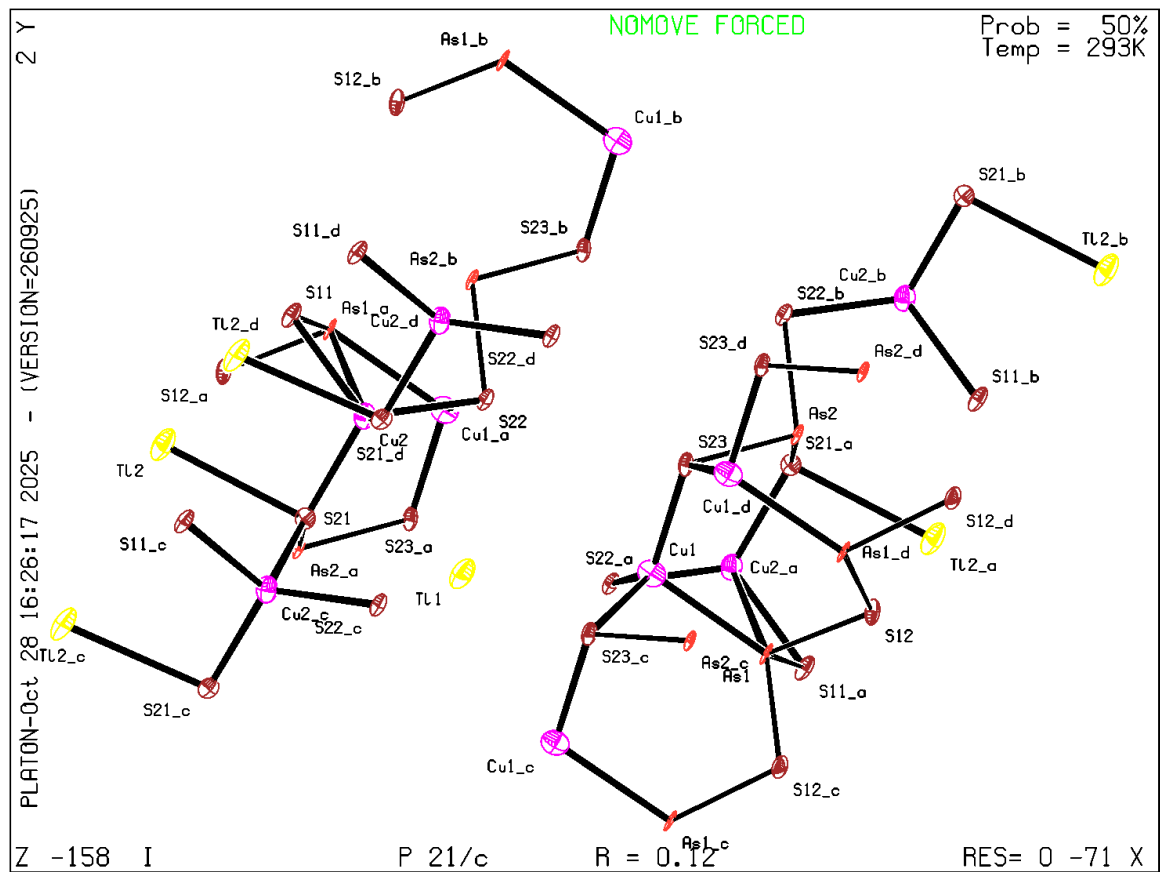

Supplement: Supplementary file 1 [file S2 splaltiite checkcif.pdf › S2 splaltiite checkcif.pdf]
