# Supplementary material for: Spaltiite, Tl 2 Cu 2 As 2 S 5 , one more new thallium sulfosalt mineral from Lengenbach quarry, Binn, Switzerland
Source: Copernicus journal article supplement (doi:10.5194/ejm-38-27-2026), 2026-01-09
Supplement: Supplementary file 2 [file S3_spaltiite acc letter.pdf › S3_spaltiite acc letter.pdf]

**INTERNATIONAL MINERALOGICAL ASSOCIATION  
COMMISSION ON NEW MINERALS, NOMENCLATURE  
AND CLASSIFICATION**

Chairman: Professor Peter A. Williams  
School of Science and Health  
University of Western Sydney

Phone: +61 2 9685 9977  
Fax: +61 2 9685 9915  
E-mail: p.williams@uws.edu.au

Postal address: School of Science and Health, University of Western Sydney, Locked Bag 1797, Penrith NSW 2751, Australia

5 May, 2014

Dear Stefan,

Congratulations on your new mineral, spaltiite (2014-012)!

**PLEASE NOTE THE CHANGE WITH RESPECT TO THE PARAGRAPH BELOW AND ON THE FOLLOWING PAGE, AND ADVISE ME BY EMAIL OF YOU WISH TO HAVE THE NAME OF YOUR MINERAL RELEASED PRIOR TO PUBLICATION OR NOT.**

The attached summary will appear in my next memorandum to the members of the Commission on New Minerals, Nomenclature and Classification. You should consider the comments of the members when you write your final description.

Although the Commission has no strict rule dealing with publication, I would ask that you ensure that the first published record of your mineral is in the scientific literature.

The CNMNC has decided to announce new minerals (**with or without their name, depending upon the authors' wishes**) with some data on the CNMNC website, one month after their approval. The text that will appear is attached below.

One of the rules of our Commission is that the description of a new mineral must be published within **two years** of notification of the approval. If publication does not take place during that time, approval of the mineral and its name will be withdrawn.

**Proof of receipt of the type specimen(s) by the curator of the collection in which the type specimen(s) have been deposited must be sent to me as soon as possible to ensure approval.**

The Commission strongly disapproves of the practice of providing specimens of new species to mineral dealers prior to the full description of the new species being published in the scientific literature.

Please send a copy of this letter with the manuscript of your description when you submit the paper for publication. This will indicate to the editor of the journal that the mineral and its name have been approved by the Commission on New Minerals, Nomenclature and Classification of the International Mineralogical Association.

Please send a reprint of the description to me when it is published.

Best regards,

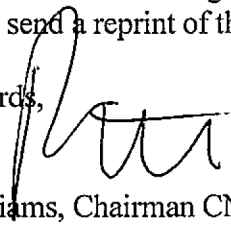  
Pete Williams, Chairman CNMNC

Encl.

**Monthly announcement of new minerals on the CNMNC website and in the  
*Mineralogical Magazine*  
with or without their name, with a limited number of data.**

The Commission on New Minerals, Nomenclature and Classification decided in January 2010 (Proposal 09-D: the early publication of new mineral names) that additional data would be published one month after the approval date on the CNMNC website, and in the *Mineralogical Magazine*, under the heading of a CNMNC Newsletter.

For your newly-approved mineral, the following data will be published in line with the above, **UNLESS YOU WISH THE MINERAL NAME TO REMAIN CONFIDENTIAL UNTIL THE FULL DESCRIPTION IS PUBLISHED. IF THIS IS THE CASE, THE NAME OF THE MINERAL WILL BE REMOVED FROM THE DATA LISTED BELOW.**

IMA No. **2014-012**

Spaltiite

Tl<sub>2</sub>Cu<sub>2</sub>As<sub>2</sub>S<sub>5</sub>

Lengenbach in Binntal, Canton Wallis, Switzerland

Stefan Graeser\*, Dan Topa, Herta Effenberger, Emil Makovicky and Werner H. Paar

E-mail: stefan.graeser@unibas.ch

New structure type

Monoclinic: *P*2<sub>1</sub>/*c*; structure determined

*a* = 15.846(8), *b* = 10.024(5), *c* = 6.343(3) Å, β = 99.037(8)°

4.002(40), 3.907(100), 3.643(80), 3.484(30), 3.128(30), 2.980(50), 2.647(60), 2.506(50)

The type specimen is deposited in the mineralogical collections of the Natural History Museum Basel, Basel, Switzerland, catalogue number S210; one type crystal is deposited in the collections of the Natural History Museum, Vienna, Austria, specimen number N 9581

How to cite: Graeser, S., Topa, D., Effenberger, H., Makovicky, E. and Paar, W.H. (2014) Spaltiite, IMA 2014-012. CNMNC Newsletter No. X, Month 2014, page X; *Mineralogical Magazine*, **XX**, XXX-XXX.
