# Supplementary material for: Spaltiite, Tl 2 Cu 2 As 2 S 5 , one more new thallium sulfosalt mineral from Lengenbach quarry, Binn, Switzerland
Source: Copernicus journal article supplement (doi:10.5194/ejm-38-27-2026), 2026-01-09
Supplement: Supplementary file [file ejm-38-27-2026-supplement-title-page.pdf › ejm-38-27-2026-supplement-title-page.pdf]

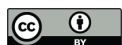

*Supplement of*

**Spaltiite,  $\text{Tl}_2\text{Cu}_2\text{As}_2\text{S}_5$ , one more new thallium sulfosalt mineral from Lengenbach quarry, Binn, Switzerland**

**Stefan Graeser et al.**

*Correspondence to:* Dan Topa ([dan.topa@nhm-wien.ac.at](mailto:dan.topa@nhm-wien.ac.at))

- [ejm-38-27-2026-supplement-title-page.pdf](#)
- [S1 spaltiite CIF.cif](#)
- [S2 splaltiite checkcif.pdf](#)
- [S3\\_spaltiite acc letter.pdf](#)

The copyright of individual parts of the supplement might differ from the article licence.
